# Supplementary material
Source: PubMed Central journal article supplement (PMC6519859)
Supplement: rccm.201808-1493OC_taranto-montemurro_data_supplement.pdf [file rccm.201808-1493OC_taranto-montemurro_data_supplement.pdf]

## ONLINE DATA SUPPLEMENT

**The combination of atomoxetine and oxybutynin greatly reduces obstructive sleep apnea severity.**

Luigi Taranto-Montemurro<sup>1</sup>, Ludovico Messineo<sup>1,2</sup>, Scott A Sands<sup>1,3</sup>, Ali Azarbarzin<sup>1</sup>,  
Melania Marques<sup>1,4</sup>, Bradley A Edwards<sup>5,6</sup>, Danny J Eckert<sup>7</sup>, David P White<sup>1</sup> and Andrew  
Wellman<sup>1</sup>.

<sup>1</sup>Division of Sleep and Circadian Disorders, Departments of Medicine and Neurology, Brigham & Women's Hospital & Harvard Medical School, Boston, Massachusetts. <sup>2</sup>Respiratory Medicine and Sleep Laboratory, Department of Internal Medicine, Spedali Civili di Brescia, University of Brescia, Brescia, Italy. <sup>3</sup>Department of Allergy, Immunology and Respiratory Medicine and Central Clinical School, The Alfred and Monash University, Melbourne, Australia; <sup>5</sup>Sleep and Circadian Medicine Laboratory, Department of Physiology Monash University, Melbourne, VIC, Australia. <sup>6</sup>School of Psychological Sciences and Monash Institute of Cognitive and Clinical Neurosciences, Monash University, Melbourne, VIC, Australia. <sup>7</sup>Neuroscience Research Australia (NeuRA) and the University of New South Wales, Randwick, Australia.

## SUPPLEMENTAL RESULTS

**Table E1. Genioglossus muscle responsiveness on and off the drugs.**

| Muscle responsiveness           | Placebo          | Ato-oxy           | Median change     | P value |
|---------------------------------|------------------|-------------------|-------------------|---------|
| %baseline/cmH <sub>2</sub> O    | 2.2 [1.0 to 4.9] | 6.3 [3.0 to 20.8] | 2.8 [1.0 to 10.5] | 0.0006  |
| %change                         |                  |                   | 102 [50 to 183]   |         |
| %wakefulness/cmH <sub>2</sub> O | 3.5 [2.0 to 9.3] | 7.5 [3.0 to 25.8] | 4 [0.8 to 17.8]   | 0.065   |
| %change                         |                  |                   | 71 [-13 to 207]   |         |
| % maximum/cmH <sub>2</sub> O    | 0.2 [0.1 to 0.4] | 0.3 [0.1 to 0.6]  | 0.1 [0.1 to 0.3]  | 0.43    |
| %change                         |                  |                   | 141 [-26 to 536]  |         |

Data are presented as median [interquartile range].

Baseline was calculated as the median Peak EMG<sub>GG</sub> during non-REM sleep with non flow-limited breaths and relatively small esophageal pressure swings (-11.0 [-17.6 to -6.8] cmH<sub>2</sub>O). Wakefulness value was calculated as the median EMG<sub>GG</sub> peak value during quiet breathing (absence of movement artifacts such as swallowing, speech, yawns) in supine position from at least 5 minutes of wakefulness recording.

Maximum EMG<sub>GG</sub> activity was measured during wakefulness on each night by triplicate measures of swallowing and tongue protrusion against the upper or lower incisors. The single maximum value obtained was used for normalization.

**Table E2. OSA severity and sleep architecture on and off the drugs in patients with AHI>15 on the placebo night (N=13).**

|                                     | Placebo             | Ato-oxy             | Median change          | P value |
|-------------------------------------|---------------------|---------------------|------------------------|---------|
| Total AHI, events/h                 | 36.8 [31.2 to 54.1] | 11.8 [5.0 to 21.2]  | -31.7 [-38.5 to -16.1] | <0.001  |
| %change                             |                     |                     | -70.6 [-89.8 to -61.6] |         |
| AHI supine, events/h                | 37.2 [31.2 to 54.7] | 11.8 [4.5 to 22.2]  | -35.4 [-42.5 to -28.0] | <0.001  |
| %change                             |                     |                     | -73 [-90 to -62]       |         |
| NREM*, events/h                     | 37.0 [32.5 to 54.9] | 11.1 [2.3 to 4.5]   | -35.5 [-43.2 to -22.1] | <0.001  |
| %change                             |                     |                     | -72 [-90 to -61]       |         |
| REM*†, events/h                     | 41.0 [24.6 to 63.2] | 2.2 [0 to 14.3]     | -34.0 [-61.0 to -13.2] | 0.004   |
| %change                             |                     |                     | -88 [-96 to -61]       |         |
| Apnea Index, events/h               | 8.1 [5.3 to 20.1]   | 0.3 [0 to 0.4]      | -5.8 [-18.8 to -1.3]   | <0.001  |
| ODI 3%, events/h                    | 22.7 [6.4 to 39.3]  | 3.7 [0.3 to 26.2]   | -9.2 [-17.7 to -2.4]   | <0.001  |
| Nadir SaO <sub>2</sub> , %          | 82 [76.5 to 92.5]   | 92 [87.5 to 95.9]   | 7 [3.4 to 17.5]        | 0.001   |
| Arousal index, events/h             | 55.8 [46.4 to 63.2] | 47.3 [39.9 to 49.4] | -11.3 [-21 to 7.8]     | 0.040   |
| Total sleep time, mins              | 196 [155 to 237]    | 278 [221 to 305]    | 55 [-6 to 139]         | 0.071   |
| Sleep efficiency, %TIB              | 49 [38 to 61]       | 67 [63 to 77]       | 16 [1 to 38]           | 0.046   |
| N1, %TST                            | 46 [19 to 56]       | 33 [29 to 42]       | -18 [-25 to 14]        | 0.210   |
| N2, %TST                            | 19 [15 to 24]       | 28 [24 to 39]       | 11 [4 to 17]           | 0.049   |
| N3, %TST                            | 0 [0 to 6]          | 0 [0 to 0]          | 0 [-4 to 0]            | 0.5     |
| REM, %TST                           | 4 [0 to 10]         | 7 [1 to 13]         | 0 [-2 to 12]           | 0.399   |
| Subjective sleep quality, VAS score | 5 [2 to 8]          | 5 [4 to 8]          | 1 [0 to 2]             | 0.076   |
| Heart rate, bpm                     | 73 [63 to 78]       | 74 [70 to 81]       | 6 [1 to 7]             | 0.009   |

|                                |                  |                  |               |      |
|--------------------------------|------------------|------------------|---------------|------|
| Systolic blood pressure, mmHg  | 142 [136 to 151] | 144 [138 to 150] | 0 [-7 to 5]   | 0.78 |
| Diastolic blood pressure, mmHg | 84 [75 to 91]    | 89 [85 to 92]    | 2 [-9 to 7.5] | 0.89 |

Data are presented as median [interquartile range]. AHI: apnea-hypopnea index; NREM: non-rapid eye movement sleep; ODI 3%, Oxygen desaturation index, 3% desaturation; SaO<sub>2</sub>: arterial oxygen saturation; ODI: oxygen desaturation index; TIB: time in bed; TST, total sleep time; N1-2-3: non-REM stage 1-2-3; VAS, visual analog scale.

\*AHI is calculated in supine position.

†REM AHI was calculated only in 6 patients in which at least 10 minutes of REM sleep were available in both nights.

**Table E3. OSA severity and sleep architecture at baseline and after 1 week of atomoxetine 80 mg + oxybutynin 5 mg (N=6). Pilot data from a prospective study.**

|                           | Baseline            | Ato-oxy             | Median change          | P value |
|---------------------------|---------------------|---------------------|------------------------|---------|
| Total AHI, events/h       | 32.8 [20.5 to 51.9] | 11.4 [9.1 to 19.3]  | -23.0 [-33.2 to -10.4] | 0.031   |
| %change                   |                     |                     | -63 [-86 to -34]       |         |
| AHI supine, events/h      | 52.8 [28.4 to 78.6] | 18.1 [12.6 to 22.0] | -39.3 [-51.5 to -11.8] | 0.031   |
| %change                   |                     |                     | -65 [-76 to -50]       |         |
| NREM*, events/h           | 59.4 [27.1 to 78.6] | 18.8 [12.6 to 21.9] | -41.0 [-57.7 to -10.0] | 0.031   |
| %change                   |                     |                     | -63 [-75 to -48]       |         |
| REM†, events/h            | 52.0 [18.2 to 80.5] | 13.5 [4.8 to 23.0]  | -33.2 [-72.3 to -4.0]  | 0.25    |
| %change                   |                     |                     | -65 [-79 to -29]       |         |
| ODI 3%, events/h          | 25.4 [16.9 to 46.7] | 13.1 [9.8 to 34.0]  | -10.5 [-17.2 to -5.4]  | 0.063   |
| Mean SaO <sub>2</sub> , % | 95.1 [92.8 to 98.0] | 95.8 [94.4 to 97.8] | 0.4 [-0.7 to 2.4]      | 0.625   |
| Nadir SaO <sub>2</sub>    | 82.0 [69.5 to 89.8] | 88.0 [76.8 to 92.3] | 4.5 [1.0 to 11.0]      | 0.031   |
| Arousal index, events/h   | 37.1 [21.6 to 66.0] | 30.6 [27.6 to 36.2] | -11.1 [-30.8 to 11.6]  | 0.438   |
| Total sleep time, mins    | 309 [237 to 371]    | 314 [259 to 352]    | -8 [-39 to 74]         | >0.99   |
| Sleep efficiency, %TIB    | 78 [56 to 87]       | 77 [65 to 85]       | 1 [-6 to 13]           | 0.688   |
| N1, %TST                  | 28 [15 to 44]       | 33 [23 to 42]       | 4 [-13 to 17]          | 0.688   |
| N2, %TST                  | 47 [26 to 64]       | 49 [44 to 56]       | -1 [-10.5 to 21.5]     | 0.844   |
| N3, %TST                  | 7 [1 to 13.5]       | 11 [3 to 25]        | 4 [-7 to 21]           | 0.469   |
| REM, %TST                 | 14 [11 to 27]       | 5 [0 to 8]          | -11 [-16 to -9]        | 0.031   |
| ESS score                 | 8 [6 to 11]         | 4.5 [2 to 6]        | -4.5 [-8.5 to 0.3]     | 0.125   |
| Heart rate, bpm           | 68.5 [59.0 to 79.5] | 74.0 [59.3 to 88.8] | 3.5 [-11 to 15.5]      | 0.687   |

|                                |                        |                        |                   |       |
|--------------------------------|------------------------|------------------------|-------------------|-------|
| Systolic blood pressure, mmHg  | 132.0 [131.0 to 152.3] | 139.0 [127.3 to 142.0] | -1 [-18.3 to 9.3] | 0.625 |
| Diastolic blood pressure, mmHg | 77 [75.3 to 86.8]      | 73 [67.3 to 87.8]      | -3.5 [-14 to 7.8] | 0.563 |

Data are presented as median [interquartile range]. AHI: apnea-hypopnea index; NREM: non-rapid eye movement sleep; ODI 3%, Oxygen desaturation index, 3% desaturation; SaO<sub>2</sub>: arterial oxygen saturation; ODI: oxygen desaturation index; TIB: time in bed; TST, total sleep time; N1-2-3: non-REM stage 1-2-3; ESS, Epworth sleepiness scale; bpm, beats per minutes.

\*AHI is calculated in supine position.

†REM AHI was calculated only in 4 patients in which at least 10 minutes of REM sleep were available in both nights.

# SUPPLEMENTAL FIGURES

## A. Placebo.

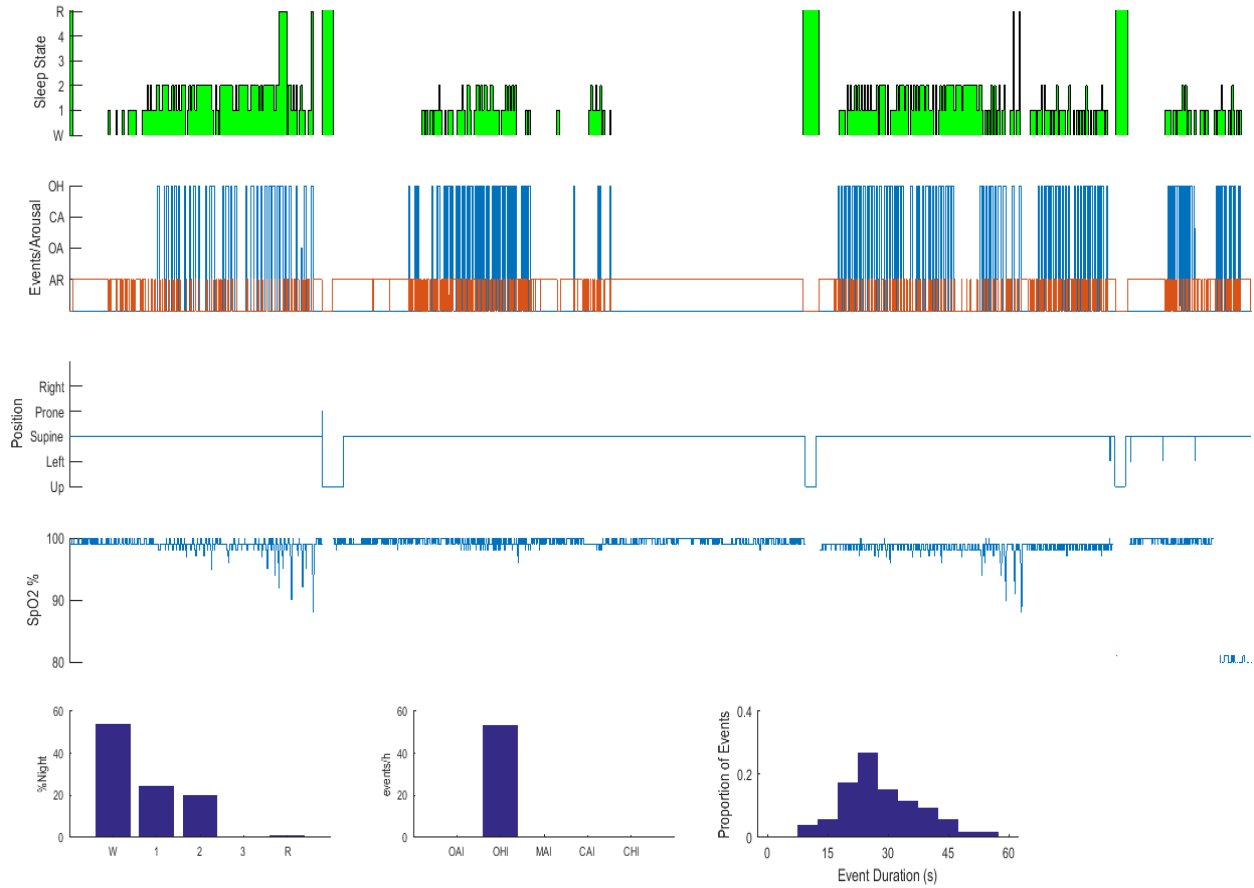

## B. Atomoxetine and oxybutynin.

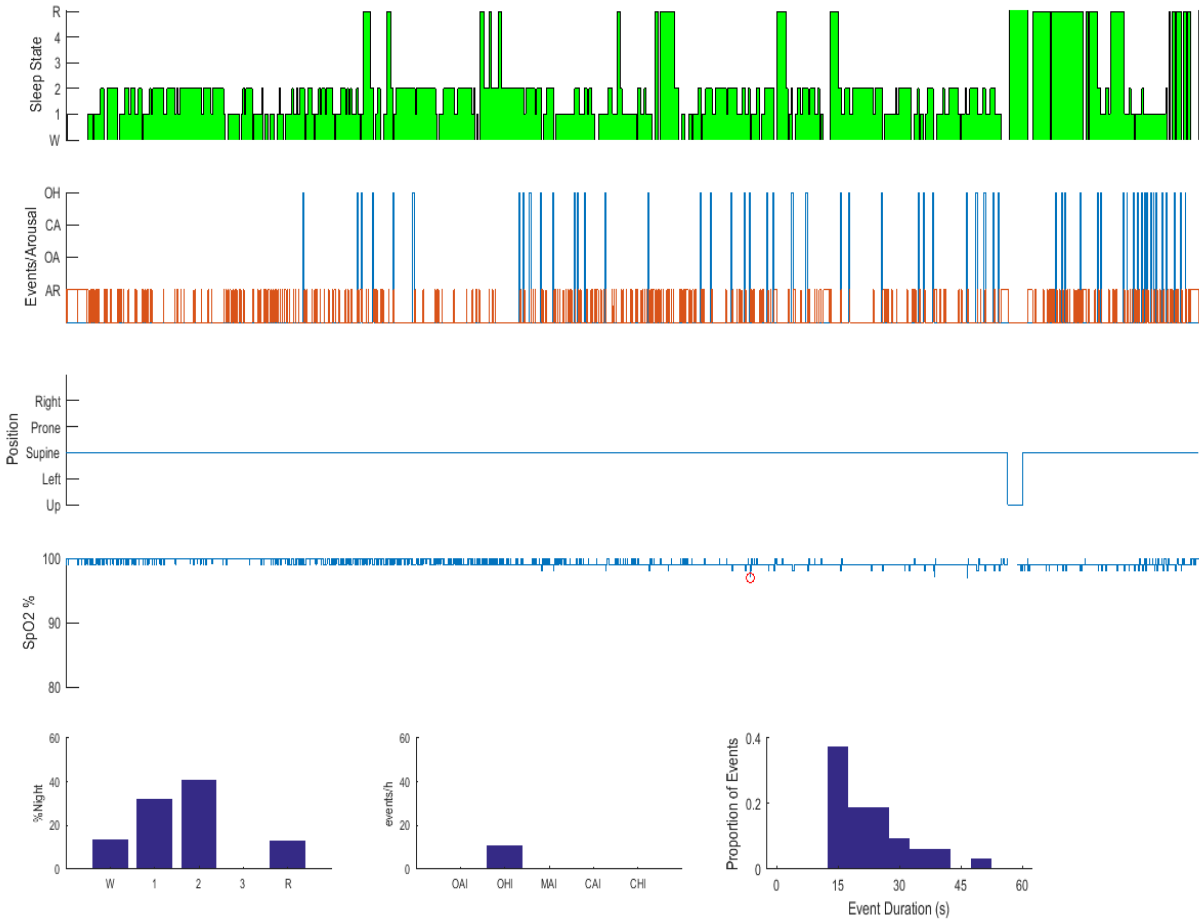

**Figure E1.**

Example of hypnograms of a representative patient. Figure A and B show from top to bottom: Sleep stages, respiratory events/arousals, body position, oxygen saturation (SpO<sub>2</sub>) and plots with summaries of sleep stages (left), respiratory events index (center) and the proportion of events for any given length (right). Figure A shows hypnogram on placebo night. This subject's sleep was highly fragmented with several hypopneas (AHI 54/h), arousals and periods of wakefulness placebo night (A). On ato-oxy night (B) sleep was more consolidated with less wakefulness and more non-REM sleep stage 1 (N1), N2 and REM while N3 was absent on both nights. There were no oxygen saturation drops and hypopneas were reduced in number (AHI 7/h) and duration. R: rapid eye movement (REM) sleep; W, wakefulness; OH, obstructive hypopneas; CA, central apneas; OA, obstructive apneas; AR, arousals.



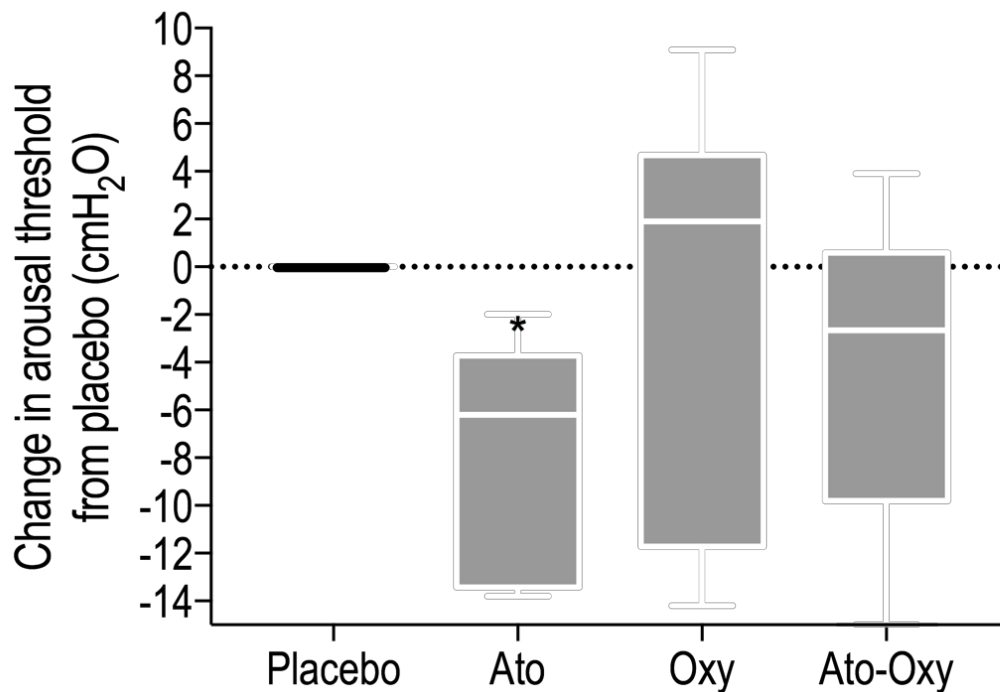

**Figure E2.** Esophageal pressure (Pes) swings were quantified based on the nadir pressure minus the level at the start of inspiration. Similar to previous physiological studies (1), Pes swings immediately prior to arousal onset were identified and included in the analysis if they were preceded by at least 3 progressively greater esophageal pressure swings in presence of flow-limited breaths or apneas in the flow signal. Arousals were otherwise considered spontaneous (non-respiratory) and excluded from the analysis. A low respiratory arousal threshold can limit the neuromuscular compensation of the upper airway and it is considered deleterious for the pathogenesis of obstructive sleep apnea (2, 3).

Atomoxetine caused a reduction in the arousal threshold by 6.2 cmH<sub>2</sub>O (\*p=0.03 vs placebo) likely because of its adrenergic properties, but the reduction in arousal threshold on atomoxetine-plus-oxybutynin (ato-oxy) was a non-significant 2.6 cmH<sub>2</sub>O (p=0.79). These data suggest that the administration of oxybutynin could attenuate the alerting effect of atomoxetine. Accordingly, previous data suggest that antimuscarinics can antagonize the central activating properties of noradrenergic drugs in animal models (4). These data refer to 6 patients who performed Pes measurements in all 4 conditions. White lines indicate medians, boxes indicate 25th (bottom) and 75th (top) percentiles.

## SUPPLEMENTAL REFERENCES

1. Sands SA, Terrill PI, Edwards BA, Taranto Montemurro L, Azarbarzin A, Marques M, de Melo CM, Loring SH, Butler JP, White D. Quantifying the Arousal Threshold using Polysomnography in Obstructive Sleep Apnea. *Sleep* 2017.
2. Eckert DJ, White DP, Jordan AS, Malhotra A, Wellman A. Defining phenotypic causes of obstructive sleep apnea. Identification of novel therapeutic targets. *American journal of respiratory and critical care medicine* 2013; 188: 996-1004.
3. Younes M. Role of arousals in the pathogenesis of obstructive sleep apnea. *Am J Respir Crit Care Med* 2004; 169: 623-633.
4. White RP, Daigneault EA. The antagonisms of atropine to the EEG effects of adrenergic drugs. *The Journal of pharmacology and experimental therapeutics* 1959; 125: 339-346.
